# Supplementary material for: Identification and Quantification of Flavonoids in Okra (Abelmoschus esculentus L. Moench) and Antiproliferative Activity In Vitro of Four Main Components Identified
Source: MDPI journal article supplement (doi:10.3390/metabo12060483), 2022-05-26
Supplement: s1 [file s1]

Table S1: Inhibitory effects of the flavonoids components on normal cell CCD-18CO (normal human colon cells).

| Flavonoids components | Inhibition growth efficiency (%) Concentration( $\mu$ mol/L) |                  |                  |                 |
|-----------------------|--------------------------------------------------------------|------------------|------------------|-----------------|
|                       | 25                                                           | 50               | 100              | 200             |
| Q3G                   | 2.52 $\pm$ 0.22                                              | 1.35 $\pm$ 0.31  | 3.71 $\pm$ 1.20  | 1.51 $\pm$ 0.32 |
| Q3S                   | -3.62 $\pm$ 1.35                                             | 2.39 $\pm$ 0.53  | 2.49 $\pm$ 0.87  | 2.72 $\pm$ 1.02 |
| ISO                   | 4.84 $\pm$ 1.34                                              | -1.47 $\pm$ 0.52 | 4.52 $\pm$ 1.40  | 3.02 $\pm$ 1.43 |
| Q3M                   | 1.25 $\pm$ 0.46                                              | 3.52 $\pm$ 0.38  | -2.27 $\pm$ 0.82 | 2.13 $\pm$ 0.72 |

Data represent the means  $\pm$  SD from three independent experiments.
