# Supplementary figures and images for: Identification and Quantification of Flavonoids in Okra (Abelmoschus esculentus L. Moench) and Antiproliferative Activity In Vitro of Four Main Components Identified
Source: MDPI journal article supplement (doi:10.3390/metabo12060483), 2022-05-26

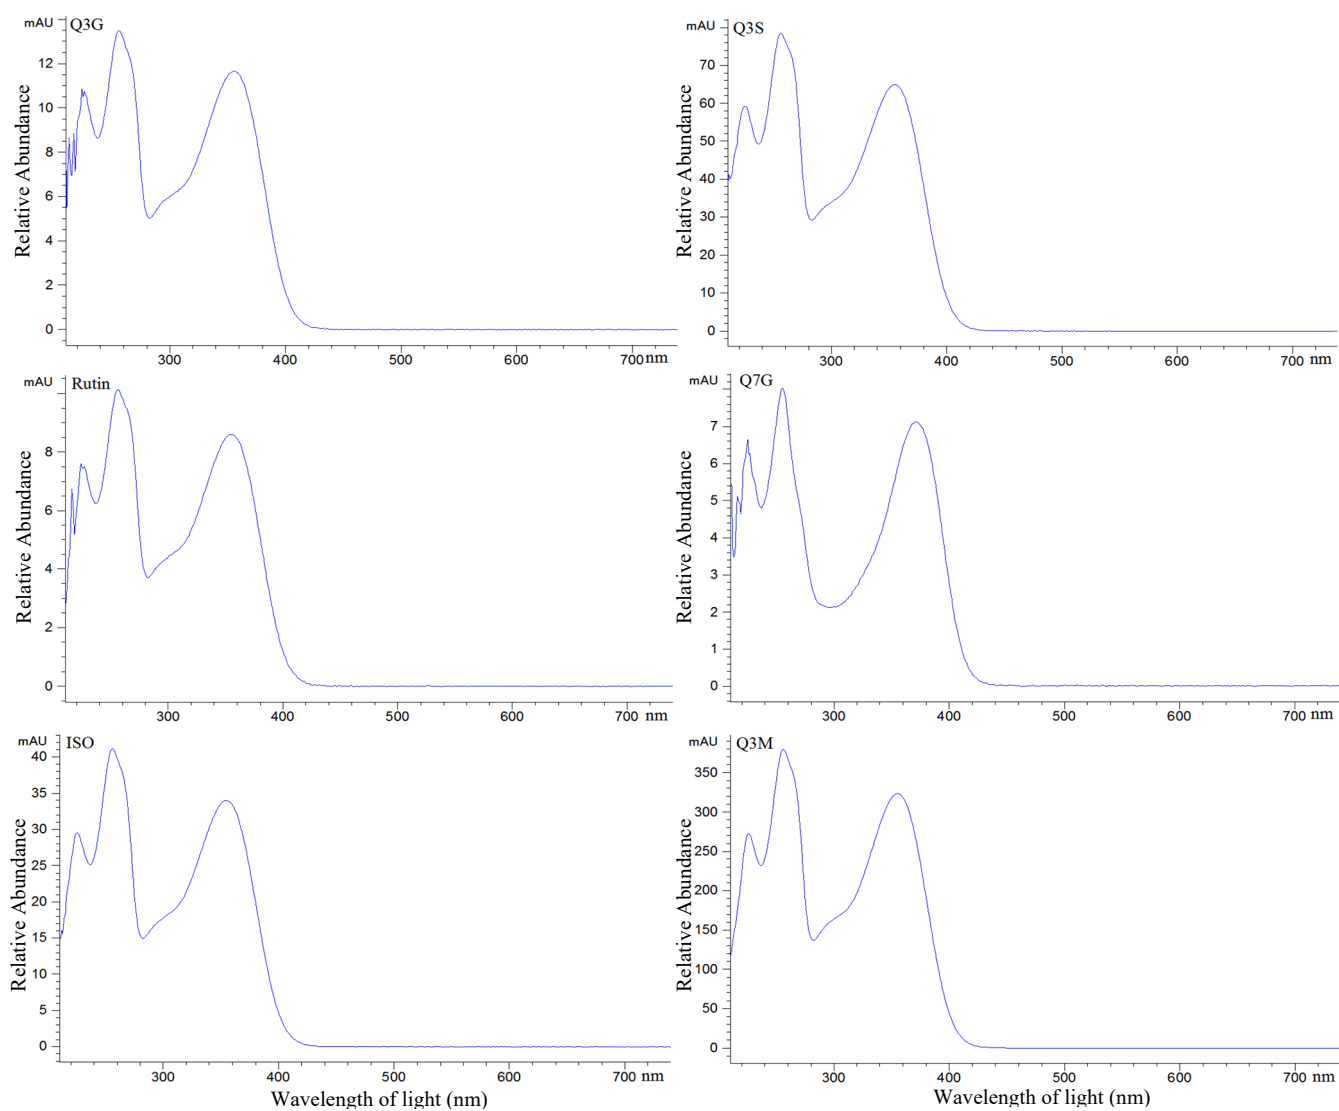

**Figure S1.** Typical UV/Vis spectra of the different flavonoids standards identified.

Supplement: s1 [file s1]
